# Supplementary material for: Similarities of developmental gene expression changes in the brain between human and experimental animals: rhesus monkey, mouse, Zebrafish, and Drosophila
Source: PubMed Central journal article supplement (PMC8425040; doi:10.1186/s13041-021-00840-4), 2021-09-07
Supplement: 13041_2021_840_MOESM1_ESM.pdf [file 13041_2021_840_MOESM1_ESM.pdf]

## Human vs. *C. elegans*

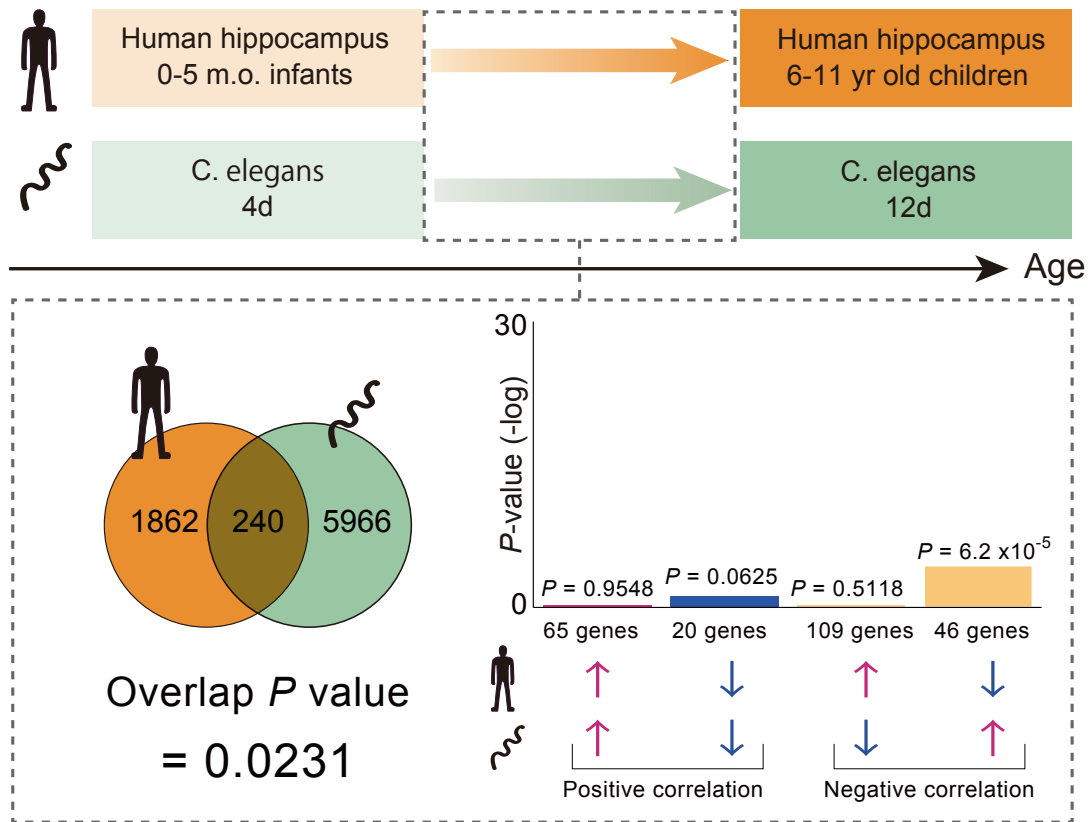

**Supplementary Figure 1. Correlation of temporal transcriptomics between brains of humans and whole-bodies of *C. elegans*.** The representative combination, which resulted in the lowest overlap  $P$ -value among all the data from developmental stages in *C. elegans* and humans (see Table S1), is indicated. Comparison of gene expression patterns in the human hippocampus of 6–11-year-old children compared with those of the whole-body of 12-day-old *C. elegans*. The Venn diagram indicates that there were 240 common genes whose expression levels significantly changed with aging in both hippocampi of 6–11-year-old children and whole-body of 12-day-old *C. elegans*, and the overlap  $P$ -value of 0.0231, as assessed by running Fisher analysis. The right bar graphs indicate that, within the 240 common genes, the expression of 65 genes increased and 20 genes decreased in both humans and *C. elegans* (i.e., positive correlation); expression of 109 genes increased and decreased in humans and *C. elegans*, respectively; and the expression of 46 genes decreased and increased in humans and *C. elegans*, respectively (i.e., negative correlation). The overlap  $P$ -values of these different types of correlations are also indicated above the corresponding bar graph.
