# Supplementary material for: Similarities of developmental gene expression changes in the brain between human and experimental animals: rhesus monkey, mouse, Zebrafish, and Drosophila
Source: PubMed Central journal article supplement (PMC8425040; doi:10.1186/s13041-021-00840-4), 2021-09-07
Supplement: 13041_2021_840_MOESM3_ESM.pdf [file 13041_2021_840_MOESM3_ESM.pdf]

## SUPPLEMENTARY METHODS

The Supplementary Methods below were adopted from Murano et al. (2019) under the terms of Creative Commons Attribution 4.0 International License (CC BY)(1).

### Computing overlap *P-values* of gene expression patterns in different datasets

BaseSpace (Illumina, San Diego, CA) was used to compare the signatures in publicly available microarray datasets with a signature provided by the user using a “Running Fisher” algorithm, as previously described (2–6). In brief, the overlap *P-value*, i.e., the direction of the correlation between two given gene expression datasets ( $b1$ ,  $b2$ ), and the *P-values* of the similarities between two subsets of gene expression datasets were calculated as follows:

Each gene signature set was rank-ordered according to the absolute fold-change value. Upregulated and downregulated genes were denoted by positive and negative signs, respectively, to indicate directionality. A directional subset was generated for each direction, such as  $b1+$ ,  $b1-$ ,  $b2+$ , and  $b2-$ .

Next, all subset pairs were identified as  $b1Di$ ,  $b2Dj$ , where  $Di$  and  $Dj$  were the available directions (+ or -) in  $b1$  and  $b2$ , respectively. We applied the Running Fisher algorithm to each subset pair. The top-ranking genes in the first subset  $b1Di$  were collected as a group,  $G$ . The second subset  $b2Dj$  was scanned from top to bottom in rank order to identify each rank with a gene matching a member in group  $G$ . At each matching rank,  $K$ , the scanned portion of the second subset  $b2Dj$ , consisted of  $N$  genes. The overlap between group  $G$  and the  $N$  genes was defined as  $M$ . Fisher’s exact test that was performed at rank  $K$  to evaluate the statistical significance of observing  $M$  overlaps between a set of size  $G$  and a set of size  $N$ , where the set of size  $G$  comes from platform  $P1$ . The set of size  $N$  comes from platform  $P2$ , given the sizes of  $P1$  and  $P2$  and the overlap between  $P1$  and  $P2$ . At the end of the scan, we retained the best *P-value* and applied multiple-hypothesis-testing correction factor. The negative log of the multiple-testing-corrected best *P-value* ( $P_{b1Di \rightarrow b2Dj}$ ) was a score ( $S_{b1Di \rightarrow b2Dj}$ ) for the subset pair. Here, the subscript  $b1Di \rightarrow b2Dj$  indicates that  $b1Di$  was the first subset used to define the top genes  $G$ , and  $b2Dj$  was the second subset used for the scan.

$$S_{b1Di \rightarrow b2Dj} = -\ln P_{b1Di \rightarrow b2Dj} \quad (1)$$

Next, we performed the Running Fisher algorithm in the reverse direction. The same procedure in this reverse direction produced another score ( $S_{b2Di \rightarrow b1Dj}$ ) for the same subset pair. The two scores were averaged to represent the magnitude of the similarity between the two subsets.

$$S_{b1Dib2Dj} = \frac{S_{b1Di \rightarrow b2Dj} + S_{b2Dj \rightarrow b1Di}}{2} \quad (2)$$

The *P-value* ( $P_{b1Dib2Dj}$ ) between  $b1Di$  and  $b2Dj$  was calculated using the following equation:

$$P_{b1Dib2Dj} = \exp(-S_{b1Dib2Dj}) \quad (3)$$

A positive sign was assigned to pairwise correlation scores ( $S_{b1+b2+}$  and  $S_{b1-b2-}$ ) for a subset pair of the same direction ( $b1+b2+$ ,  $b1-b2-$ ), and a negative sign was assigned to pairwise correlation scores ( $S_{b1+b2-}$  and  $S_{b1-b2+}$ ) for a subset pair of opposite directions ( $b1+b2-$ ,  $b1-b2+$ ). Then, we calculated the overall score ( $S_{b1b2}$ ) between  $b1$  and  $b2$  from the correlation scores ( $S_{b1+b2+}$ ,  $S_{b1-b2-}$ ,  $S_{b1+b2-}$ , and  $S_{b1-b2+}$ ) of subset pairs using the following equation:

$$S_{b1b2} = \frac{S_{b1+b1+} + S_{b1-b2-}}{2} - \frac{S_{b1+b2-} + S_{b1-b2+}}{2} \quad (4)$$

The sign of  $S_{b1b2}$  reflected whether the two signatures were positively or negatively correlated. The overall *P-value* ( $P_{b1b2}$ ) between  $b1$  and  $b2$  was calculated using the following equation:

$$P_{b1b2} = \exp(-|S_{b1b2}|) \quad (5)$$

This overall *P-value* is referred to as the “overlap *P-value*” between two gene expression patterns in this paper.

#### REFERENCES IN SUPPLEMENTARY METHODS

1. Murano T, Hagihara H, Tajinda K, Matsumoto M, Miyakawa T. Transcriptomic immaturity inducible by neural hyperexcitation is shared by multiple neuropsychiatric disorders. *Communications Biology*. 2019 Jan 22;2(1):32.
2. Murano T, Koshimizu H, Hagihara H, Miyakawa T. Transcriptomic immaturity of the hippocampus and prefrontal cortex in patients with alcoholism. *Scientific Reports*. 2017 Mar;7:44531.
3. Hagihara H, Ohira K, Takao K, Miyakawa T. Transcriptomic evidence for immaturity of the prefrontal cortex in patients with schizophrenia. *Mol Brain*. 2014 May 29;7:41.
4. Ryan SD, Dolatabadi N, Chan SF, Zhang X, Akhtar MW, Parker J, et al. Isogenic Human iPSC Parkinson's Model Shows Nitrosative Stress-Induced Dysfunction in MEF2-PGC1 $\alpha$  Transcription. *Cell*. 2013 Dec;155(6):1351–64.
5. Takao K, Miyakawa T. Genomic responses in mouse models greatly mimic human inflammatory diseases. *PNAS*. 2015 Jan 27;112(4):1167–72.
6. Kupersmidt I, Su QJ, Grewal A, Sundaresh S, Halperin I, Flynn J, et al. Ontology-based meta-analysis of global collections of high-throughput public data. *PLoS ONE*. 2010 Sep;5(9):e13066.
